# Supplementary material for: Scaling-up a pharmacist-led information technology intervention (PINCER) to reduce hazardous prescribing in general practices: Multiple interrupted time series study
Source: PubMed Central journal article supplement (PMC9718399; doi:10.1371/journal.pmed.1004133), 2022-11-16
Supplement: pmed.1004133.s001.pdf [file pmed.1004133.s001.pdf]

S1 Appendix. Rollout of the PINCER intervention across general practices in 11 CCGs

| CCG                    | Date first practice initiated | Q1 2015 |     |     | Q2 2015/16 |     |     | Q3 2016 |     |     | Q4 2016 |     |     | Q1 2016 |     |     | Q2 2016/17 |     |     | Q3 2017 |     |     | Total (CCG) |
|------------------------|-------------------------------|---------|-----|-----|------------|-----|-----|---------|-----|-----|---------|-----|-----|---------|-----|-----|------------|-----|-----|---------|-----|-----|-------------|
|                        |                               | Aug     | Sep | Oct | Nov        | Dec | Jan | Feb     | Mar | Apr | May     | Jun | Jul | Aug     | Sep | Oct | Nov        | Dec | Jan | Feb     | Mar | Apr |             |
| 1                      | 25/09/2015                    |         | 2   | 18  | 2          |     |     |         | 1   |     |         |     |     |         |     |     |            |     |     |         |     | 23  |             |
| 2                      | 01/10/2015                    |         |     | 35  | 13         | 1   |     | 1       |     |     | 2       | 2   |     |         |     |     |            |     |     |         |     | 54  |             |
| 3                      | 16/10/2015                    |         |     | 6   | 5          | 1   |     |         |     |     |         |     |     |         |     |     |            |     |     |         |     | 12  |             |
| 4                      | 30/10/2016                    |         |     | 1   | 2          | 6   | 3   |         |     |     |         |     |     |         |     |     |            |     |     |         |     | 12  |             |
| 5                      | 26/01/2016                    |         |     |     |            |     | 2   | 3       | 3   | 3   | 3       | 1   |     | 1       |     |     |            |     |     |         |     | 19  |             |
| 6                      | 16/02/2016                    |         |     |     |            |     |     | 4       | 25  | 4   | 2       |     |     |         |     |     |            |     |     |         |     | 35  |             |
| 7                      | 12/02/2016                    |         |     |     |            |     |     | 2       | 13  |     |         |     |     |         |     |     |            |     |     |         |     | 15  |             |
| 8                      | 14/04/2016                    |         |     |     |            |     |     |         |     | 26  | 10      | 4   | 1   |         | 1   | 1   |            |     |     |         |     | 43  |             |
| 9                      | 16/05/2016                    |         |     |     |            |     |     |         |     |     | 4       | 9   | 5   | 18      | 9   | 6   | 6          |     |     |         | 1   | 58  |             |
| 10                     | 01/07/2016                    |         |     |     |            |     |     |         |     |     |         | 18  | 3   | 8       |     |     |            | 2   |     |         |     | 31  |             |
| 11                     | 10/08/2016                    |         |     |     |            |     |     |         |     |     |         |     |     | 1       | 13  | 7   | 17         | 2   |     |         | 1   | 41  |             |
| <b>Total (month)</b>   |                               |         | 2   | 60  | 22         | 8   | 5   | 9       | 42  | 34  | 19      | 18  | 27  | 22      | 32  | 14  | 23         | 2   | 2   |         | 2   |     |             |
| <b>Total (quarter)</b> |                               | 62      |     |     | 35         |     |     | 85      |     |     | 64      |     |     | 68      |     |     | 27         |     |     | 2       |     |     | 343         |

The cells contain the number of practices in each quarter that ran the first computer queries to identify patients at risk, as part of the PINCER intervention.

Q, quarter; CCG, Clinical commissioning group.
