# Supplementary material for: Scaling-up a pharmacist-led information technology intervention (PINCER) to reduce hazardous prescribing in general practices: Multiple interrupted time series study
Source: PubMed Central journal article supplement (PMC9718399; doi:10.1371/journal.pmed.1004133), 2022-11-16
Supplement: pmed.1004133.s003.pdf [file pmed.1004133.s003.pdf]

STROBE Statement—checklist of items that should be included in reports of observational studies

|                           | <b>Item No.</b> | <b>Recommendation</b>                                                                                                           | <b>Section and paragraph number</b>                                                                  | <b>Relevant text from manuscript</b>                                                                                                                                                                                                                                                               |
|---------------------------|-----------------|---------------------------------------------------------------------------------------------------------------------------------|------------------------------------------------------------------------------------------------------|----------------------------------------------------------------------------------------------------------------------------------------------------------------------------------------------------------------------------------------------------------------------------------------------------|
| <b>Title and abstract</b> | 1               | (a) Indicate the study’s design with a commonly used term in the title or the abstract                                          | Title                                                                                                | Multiple interrupted time series design                                                                                                                                                                                                                                                            |
|                           |                 | (b) Provide in the abstract an informative and balanced summary of what was done and what was found                             | Abstract, Methods and findings, paragraph 1<br>Abstract                                              |                                                                                                                                                                                                                                                                                                    |
| <b>Introduction</b>       |                 |                                                                                                                                 |                                                                                                      |                                                                                                                                                                                                                                                                                                    |
| Background/rationale      | 2               | Explain the scientific background and rationale for the investigation being reported                                            | Introduction, paragraphs 1-4                                                                         |                                                                                                                                                                                                                                                                                                    |
| Objectives                | 3               | State specific objectives, including any prespecified hypotheses                                                                | Introduction, paragraphs 5                                                                           | Objective- to assess whether PINCER was effective at reducing rates of hazardous prescribing when rolled out at scale across the East Midlands in the real world setting.<br><br>Hypothesis -the intervention would result in clinically important, sustained reductions in hazardous prescribing. |
| <b>Methods</b>            |                 |                                                                                                                                 |                                                                                                      |                                                                                                                                                                                                                                                                                                    |
| Study design              | 4               | Present key elements of study design early in the paper                                                                         | Methods- Study design and participants, paragraph 1<br><br>Methods- Statistical methods, paragraph 1 |                                                                                                                                                                                                                                                                                                    |
| Setting                   | 5               | Describe the setting, locations, and relevant dates, including periods of recruitment, exposure, follow-up, and data collection | Setting/ location- Methods- Study design and participants, paragraph 2                               |                                                                                                                                                                                                                                                                                                    |

|                              |    |                                                                                                                                                                                                                                                                                                                                                                                                                                                                                    |                                                                    |                                                                |
|------------------------------|----|------------------------------------------------------------------------------------------------------------------------------------------------------------------------------------------------------------------------------------------------------------------------------------------------------------------------------------------------------------------------------------------------------------------------------------------------------------------------------------|--------------------------------------------------------------------|----------------------------------------------------------------|
|                              |    |                                                                                                                                                                                                                                                                                                                                                                                                                                                                                    | Exposure- Methods- The Intervention, bullet point 1                |                                                                |
|                              |    |                                                                                                                                                                                                                                                                                                                                                                                                                                                                                    | Follow up/ data collection- Methods- Outcome measures, paragraph 1 |                                                                |
| Participants                 | 6  | <p>(a) <i>Cohort study</i>—Give the eligibility criteria, and the sources and methods of selection of participants. Describe methods of follow-up</p> <p><i>Case-control study</i>—Give the eligibility criteria, and the sources and methods of case ascertainment and control selection. Give the rationale for the choice of cases and controls</p> <p><i>Cross-sectional study</i>—Give the eligibility criteria, and the sources and methods of selection of participants</p> | Methods- Study design and participants, paragraph 2                |                                                                |
|                              |    | <p>(b) <i>Cohort study</i>—For matched studies, give matching criteria and number of exposed and unexposed</p> <p><i>Case-control study</i>—For matched studies, give matching criteria and the number of controls per case</p>                                                                                                                                                                                                                                                    | n/a                                                                |                                                                |
| Variables                    | 7  | Clearly define all outcomes, exposures, predictors, potential confounders, and effect modifiers. Give diagnostic criteria, if applicable                                                                                                                                                                                                                                                                                                                                           | Outcomes- Methods- outcome measures, paragraph 2                   |                                                                |
|                              |    |                                                                                                                                                                                                                                                                                                                                                                                                                                                                                    | Exposures- Methods- outcome measures, paragraph 1                  |                                                                |
|                              |    |                                                                                                                                                                                                                                                                                                                                                                                                                                                                                    | potential confounders- Methods- Statistical Methods, paragraph 5   |                                                                |
| Data sources/<br>measurement | 8* | For each variable of interest, give sources of data and details of methods of assessment (measurement). Describe comparability of assessment methods if there is more than one group                                                                                                                                                                                                                                                                                               | Methods- The Intervention, paragraph 4                             | Methods- The Intervention, paragraph 4                         |
| Bias                         | 9  | Describe any efforts to address potential sources of bias                                                                                                                                                                                                                                                                                                                                                                                                                          | Results-Table 2                                                    | Characteristics of the practices included were compared to all |

|                        |     |                                                                                                                                                                                                                                                                                                           |                                                     |                                                                                                                                                                                                                                                                     |
|------------------------|-----|-----------------------------------------------------------------------------------------------------------------------------------------------------------------------------------------------------------------------------------------------------------------------------------------------------------|-----------------------------------------------------|---------------------------------------------------------------------------------------------------------------------------------------------------------------------------------------------------------------------------------------------------------------------|
|                        |     |                                                                                                                                                                                                                                                                                                           |                                                     | English practices to check for bias                                                                                                                                                                                                                                 |
| Study size             | 10  | Explain how the study size was arrived at                                                                                                                                                                                                                                                                 | Methods- Study design and participants. paragraph 2 | All practices in the East Midlands were invited to participate.                                                                                                                                                                                                     |
| Quantitative variables | 11  | Explain how quantitative variables were handled in the analyses. If applicable, describe which groupings were chosen and why                                                                                                                                                                              | Methods- Outcome measures, paragraph 1 and 2        |                                                                                                                                                                                                                                                                     |
| Statistical methods    | 12  | (a) Describe all statistical methods, including those used to control for confounding                                                                                                                                                                                                                     | Methods- Statistical methods, paragraphs 1 to 6     |                                                                                                                                                                                                                                                                     |
|                        |     | (b) Describe any methods used to examine subgroups and interactions                                                                                                                                                                                                                                       | Methods- Statistical methods, paragraph 5           |                                                                                                                                                                                                                                                                     |
|                        |     | (c) Explain how missing data were addressed                                                                                                                                                                                                                                                               | Methods- Statistical methods, paragraph 3           |                                                                                                                                                                                                                                                                     |
|                        |     | (d) <i>Cohort study</i> —If applicable, explain how loss to follow-up was addressed<br><i>Case-control study</i> —If applicable, explain how matching of cases and controls was addressed<br><i>Cross-sectional study</i> —If applicable, describe analytical methods taking account of sampling strategy | Methods- Statistical methods, paragraph 2           |                                                                                                                                                                                                                                                                     |
|                        |     | (e) Describe any sensitivity analyses                                                                                                                                                                                                                                                                     | Results, paragraph 1                                | As a sensitivity analysis, we also repeated the analysis including only practices with at least 6 months of follow up data.<br><br>We compared the raw and adjusted pre implementation rates for those practices with up to 6 months and up to 12 months follow up. |
| <b>Results</b>         |     |                                                                                                                                                                                                                                                                                                           |                                                     |                                                                                                                                                                                                                                                                     |
| Participants           | 13* | (a) Report numbers of individuals at each stage of study—eg numbers potentially eligible, examined for eligibility, confirmed eligible, included in the study, completing follow-up, and analysed                                                                                                         | Results, paragraph 1                                | PINCER was implemented in 370 practices and data were collected for 343 practices                                                                                                                                                                                   |
|                        |     | (b) Give reasons for non-participation at each stage                                                                                                                                                                                                                                                      | Results, paragraph 1                                | Ten practices had closed by the end of the implementation period, and 11 practices from one                                                                                                                                                                         |

|                  |     |                                                                                                                                                                                                              |                      |                                                                                                                                                                                                                               |
|------------------|-----|--------------------------------------------------------------------------------------------------------------------------------------------------------------------------------------------------------------|----------------------|-------------------------------------------------------------------------------------------------------------------------------------------------------------------------------------------------------------------------------|
|                  |     |                                                                                                                                                                                                              |                      | CCG were involved in piloting PINCER.<br>A practice must have run the intervention and uploaded at least one quarter of data.                                                                                                 |
|                  |     | (c) Consider use of a flow diagram                                                                                                                                                                           | n/a                  |                                                                                                                                                                                                                               |
| Descriptive data | 14* | (a) Give characteristics of study participants (eg demographic, clinical, social) and information on exposures and potential confounders                                                                     | Results, Table 2     |                                                                                                                                                                                                                               |
|                  |     | (b) Indicate number of participants with missing data for each variable of interest                                                                                                                          | Results, paragraph 1 | At 6 months follow up, data for 212 practices were collected and by 12 months follow up, this had reduced to 70 (S4 Appendix).                                                                                                |
|                  |     | (c) <i>Cohort study</i> —Summarise follow-up time (eg, average and total amount)                                                                                                                             | n/a                  |                                                                                                                                                                                                                               |
| Outcome data     | 15* | <i>Cohort study</i> —Report numbers of outcome events or summary measures over time                                                                                                                          | S1 Appendix          |                                                                                                                                                                                                                               |
|                  |     | <i>Case-control study</i> —Report numbers in each exposure category, or summary measures of exposure                                                                                                         | n/a                  |                                                                                                                                                                                                                               |
|                  |     | <i>Cross-sectional study</i> —Report numbers of outcome events or summary measures                                                                                                                           | n/a                  |                                                                                                                                                                                                                               |
| Main results     | 16  | (a) Give unadjusted estimates and, if applicable, confounder-adjusted estimates and their precision (eg, 95% confidence interval). Make clear which confounders were adjusted for and why they were included | Results, table 4     | adjusted for general practice and calendar time                                                                                                                                                                               |
|                  |     | (b) Report category boundaries when continuous variables were categorized                                                                                                                                    | n/a                  |                                                                                                                                                                                                                               |
|                  |     | (c) If relevant, consider translating estimates of relative risk into absolute risk for a meaningful time period                                                                                             | n/a                  |                                                                                                                                                                                                                               |
| Other analyses   | 17  | Report other analyses done—eg analyses of subgroups and interactions, and sensitivity analyses                                                                                                               | Results, paragraph 1 | As a sensitivity analysis, we also repeated the analysis including only practices with at least 6 months of follow up data.<br><br>We compared the raw and adjusted pre implementation rates for those practices with up to 6 |

---

months and up to 12 months follow up.

---

**Discussion**

|                  |    |                                                                                                                                                                            |                            |
|------------------|----|----------------------------------------------------------------------------------------------------------------------------------------------------------------------------|----------------------------|
| Key results      | 18 | Summarise key results with reference to study objectives                                                                                                                   | Discussion, paragraph 1-3  |
| Limitations      | 19 | Discuss limitations of the study, taking into account sources of potential bias or imprecision. Discuss both direction and magnitude of any potential bias                 | Discussion, paragraph 9-12 |
| Interpretation   | 20 | Give a cautious overall interpretation of results considering objectives, limitations, multiplicity of analyses, results from similar studies, and other relevant evidence | Discussion, paragraph 16   |
| Generalisability | 21 | Discuss the generalisability (external validity) of the study results                                                                                                      | Discussion, paragraph 8    |

**Other information**

|         |    |                                                                                                                                                               |                 |                                                     |
|---------|----|---------------------------------------------------------------------------------------------------------------------------------------------------------------|-----------------|-----------------------------------------------------|
| Funding | 22 | Give the source of funding and the role of the funders for the present study and, if applicable, for the original study on which the present article is based | Funding section | Health Foundation, London<br>England; East Midlands |
|---------|----|---------------------------------------------------------------------------------------------------------------------------------------------------------------|-----------------|-----------------------------------------------------|

\*Give information separately for cases and controls in case-control studies and, if applicable, for exposed and unexposed groups in cohort and cross-sectional studies.

**Note:** An Explanation and Elaboration article discusses each checklist item and gives methodological background and published examples of transparent reporting. The STROBE checklist is best used in conjunction with this article (freely available on the Web sites of PLoS Medicine at <http://www.plosmedicine.org/>, Annals of Internal Medicine at <http://www.annals.org/>, and Epidemiology at <http://www.epidem.com/>). Information on the STROBE Initiative is available at [www.strobe-statement.org](http://www.strobe-statement.org).
