# Supplementary material for: Scaling-up a pharmacist-led information technology intervention (PINCER) to reduce hazardous prescribing in general practices: Multiple interrupted time series study
Source: PubMed Central journal article supplement (PMC9718399; doi:10.1371/journal.pmed.1004133), 2022-11-16
Supplement: pmed.1004133.s004.pdf [file pmed.1004133.s004.pdf]

S4 Appendix. The number of practices included at each quarter, by time since the intervention

| Quarter number | Freq. |
|----------------|-------|
| -14            | 2     |
| -13            | 6     |
| -12            | 75    |
| -11            | 142   |
| -10            | 236   |
| -9             | 258   |
| -8             | 342   |
| -7             | 343   |
| -6             | 343   |
| -5             | 341   |
| -4             | 343   |

| Quarter number | Freq. |
|----------------|-------|
| -3             | 343   |
| -2             | 342   |
| -1             | 341   |
| 0              | 334   |
| 1              | 310   |
| 2              | 212   |
| 3              | 127   |
| 4              | 70    |
| 5              | 42    |
| 6              | 30    |
| 7              | 27    |
