# Supplementary material for: Scaling-up a pharmacist-led information technology intervention (PINCER) to reduce hazardous prescribing in general practices: Multiple interrupted time series study
Source: PubMed Central journal article supplement (PMC9718399; doi:10.1371/journal.pmed.1004133), 2022-11-16
Supplement: pmed.1004133.s005.pdf [file pmed.1004133.s005.pdf]

S5 Appendix. Comparing the rate of hazardous prescribing at 6 months and 12 months post-intervention to pre intervention, adjusted for GP practice and calendar time (excluding practices with less than 6 months of data post intervention)

| Outcome                  | Raw data <sup>a</sup> |                   | Pre-implementation                  | 6 months                            |                          | 12 months                           |                          |
|--------------------------|-----------------------|-------------------|-------------------------------------|-------------------------------------|--------------------------|-------------------------------------|--------------------------|
|                          | Number at risk        | Rate <sup>b</sup> | Fitted rate (95% CI) <sup>b,c</sup> | Fitted rate (95% CI) <sup>b,c</sup> | OR (95% CI) <sup>d</sup> | Fitted rate (95% CI) <sup>b,c</sup> | OR (95% CI) <sup>d</sup> |
| <b>Overall composite</b> | 581296                | 26.7              | 26.3<br>(26.2:26.3)                 | 21.9<br>(21.8:22.0)                 | 0.83<br>(0.80:0.86)      | 22.3<br>(22.2:22.3)                 | 0.84<br>(0.80:0.89)      |
| <b>GI composite</b>      | 356119                | 31.6              | 31.5<br>(31.5:31.6)                 | 24.0<br>(24.0:24.1)                 | 0.76<br>(0.72:0.79)      | 24.0<br>(23.9:24.1)                 | 0.76<br>(0.70:0.82)      |
| <b>Indicator A</b>       | 231450                | 27.4              | 25.6<br>(25.5:25.7)                 | 18.7<br>(18.6:18.8)                 | 0.72<br>(0.68:0.77)      | 17.4<br>(17.3:17.5)                 | 0.67<br>(0.60:0.76)      |
| <b>Indicator B</b>       | 15043                 | 25.8              | 22.8<br>(22.7:22.9)                 | 17.9<br>(17.7:18.1)                 | 0.78<br>(0.67:0.91)      | 15.9<br>(15.6:16.1)                 | 0.69<br>(0.55:0.87)      |
| <b>Indicator C</b>       | 15043                 | 88.2              | 81.4<br>(81.3:81.4)                 | 65.0<br>(64.9:65.1)                 | 0.78<br>(0.72:0.85)      | 60.8<br>(60.6:60.9)                 | 0.73<br>(0.65:0.82)      |
| <b>Indicator D</b>       | 31483                 | 13.8              | 11.9<br>(11.8:12.0)                 | 11.6<br>(11.4:11.7)                 | 0.97<br>(0.86:1.10)      | 10.8<br>(10.7:11.0)                 | 0.91<br>(0.78:1.06)      |
| <b>Indicator E</b>       | 20155                 | 40.7              | 38.9<br>(38.8:39.0)                 | 27.4<br>(27.3:27.5)                 | 0.70<br>(0.62:0.78)      | 30.8<br>(30.6:31.0)                 | 0.78<br>(0.66:0.93)      |
| <b>Indicator F</b>       | 42946                 | 45.2              | 44.6<br>(44.5:44.6)                 | 35.9<br>(35.8:35.9)                 | 0.80<br>(0.74:0.86)      | 38.1<br>(38.0:38.2)                 | 0.85<br>(0.75:0.97)      |
| <b>Indicator G</b>       | 171795                | 9.1               | 7.8<br>(7.8:7.9)                    | 7.7<br>(7.6:7.8)                    | 0.98<br>(0.92:1.04)      | 8.2<br>(8.1:8.3)                    | 1.04<br>(0.95:1.14)      |
| <b>Indicator H</b>       | 3765                  | 160.9             | 189.2<br>(189.1:189.4)              | 192.6<br>(192.4:192.7)              | 1.02<br>(0.91:1.15)      | 163.6<br>(163.4:163.9)              | 0.84<br>(0.67:1.05)      |
| <b>Indicator I</b>       | 15220                 | 22.3              | 19.8<br>(19.6:19.9)                 | 17.4<br>(17.3:17.6)                 | 0.88<br>(0.78:0.99)      | 16.1<br>(15.8:16.3)                 | 0.81<br>(0.65:1.01)      |
| <b>Indicator J</b>       | 13587                 | 92.7              | 79.2<br>(79.1:79.3)                 | 84.9<br>(84.8:85.0)                 | 1.08<br>(1.00:1.17)      | 92.2<br>(92.1:92.3)                 | 1.18<br>(1.05:1.33)      |
| <b>Indicator K</b>       | 20811                 | 24.5              | 20.9<br>(20.8:21.1)                 | 19.1<br>(18.9:19.2)                 | 0.91<br>(0.80:1.03)      | 16.8<br>(16.6:17.0)                 | 0.80<br>(0.66:0.97)      |

GI, Gastrointestinal; OR, Odds ratio; CI, Confidence interval

<sup>a</sup> Number at risk and pre-intervention rates estimated as mean over the 4 quarters prior to intervention at each site

<sup>b</sup> Rate per 1000 patients at risk

<sup>c</sup> Fitted rates are adjusted for calendar time

<sup>d</sup> Odds ratio relative to pre-implementation
