# Supplementary material for: Scaling-up a pharmacist-led information technology intervention (PINCER) to reduce hazardous prescribing in general practices: Multiple interrupted time series study
Source: PubMed Central journal article supplement (PMC9718399; doi:10.1371/journal.pmed.1004133), 2022-11-16

S7 Appendix. Plots for each Individual Indicator

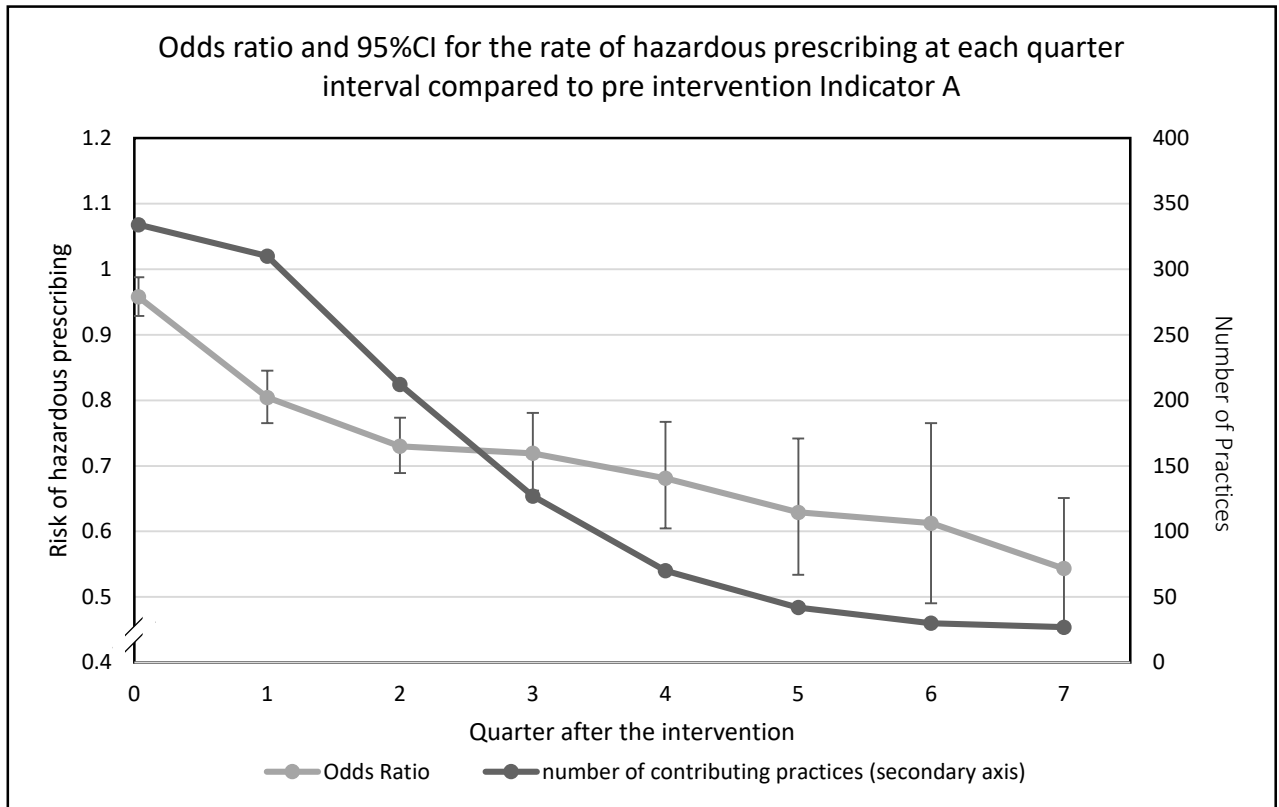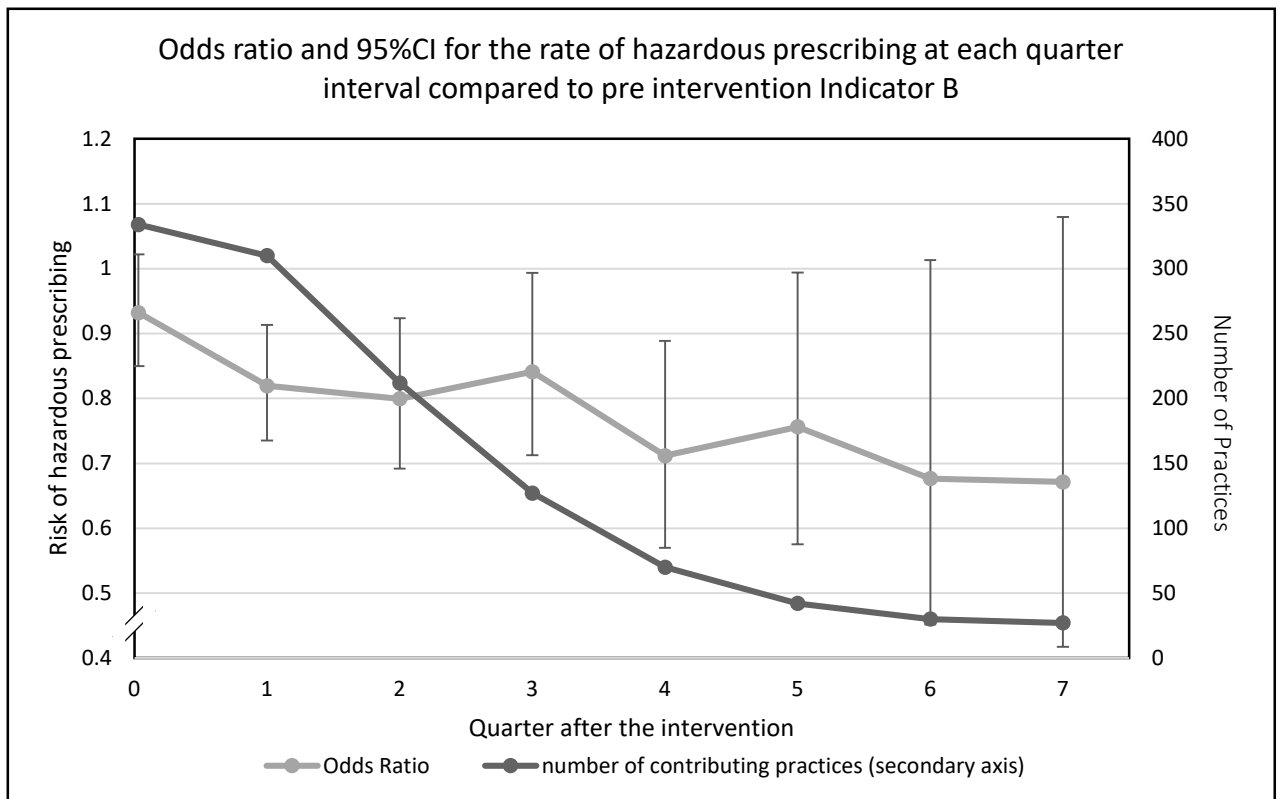

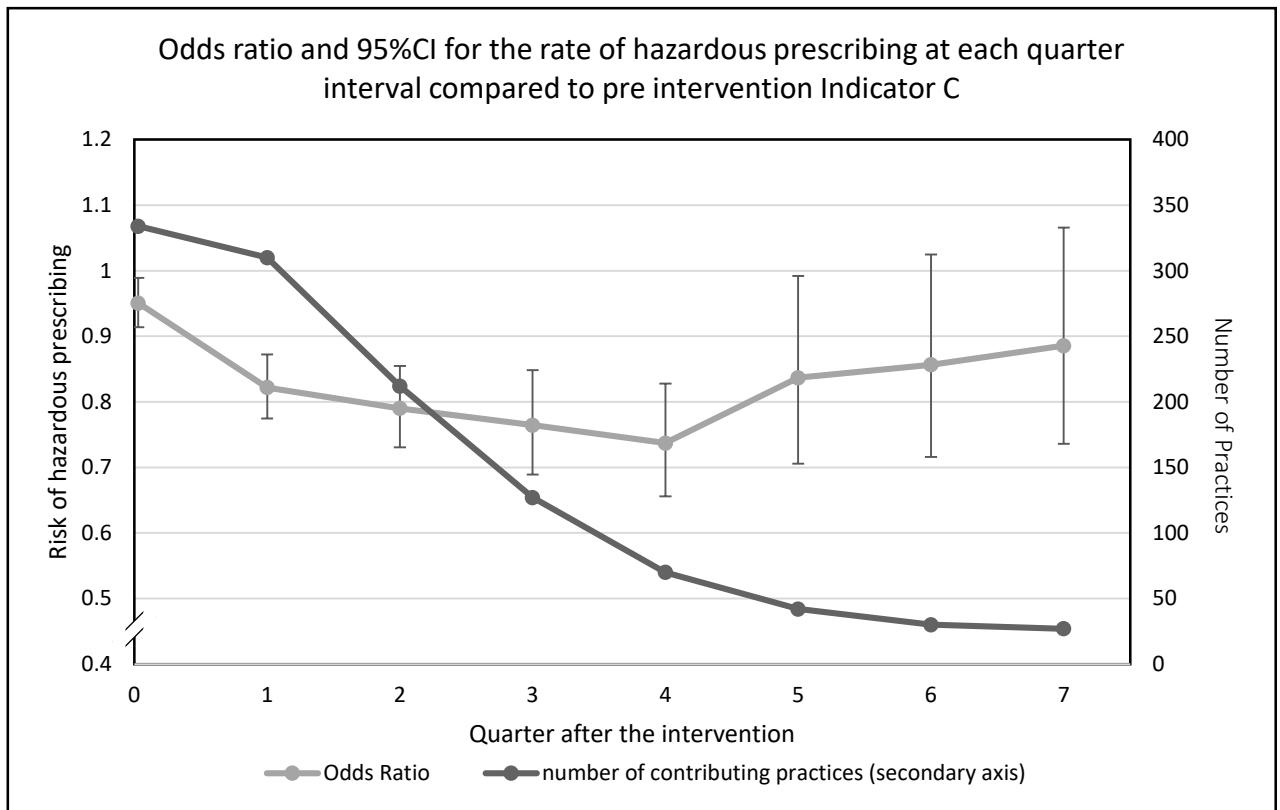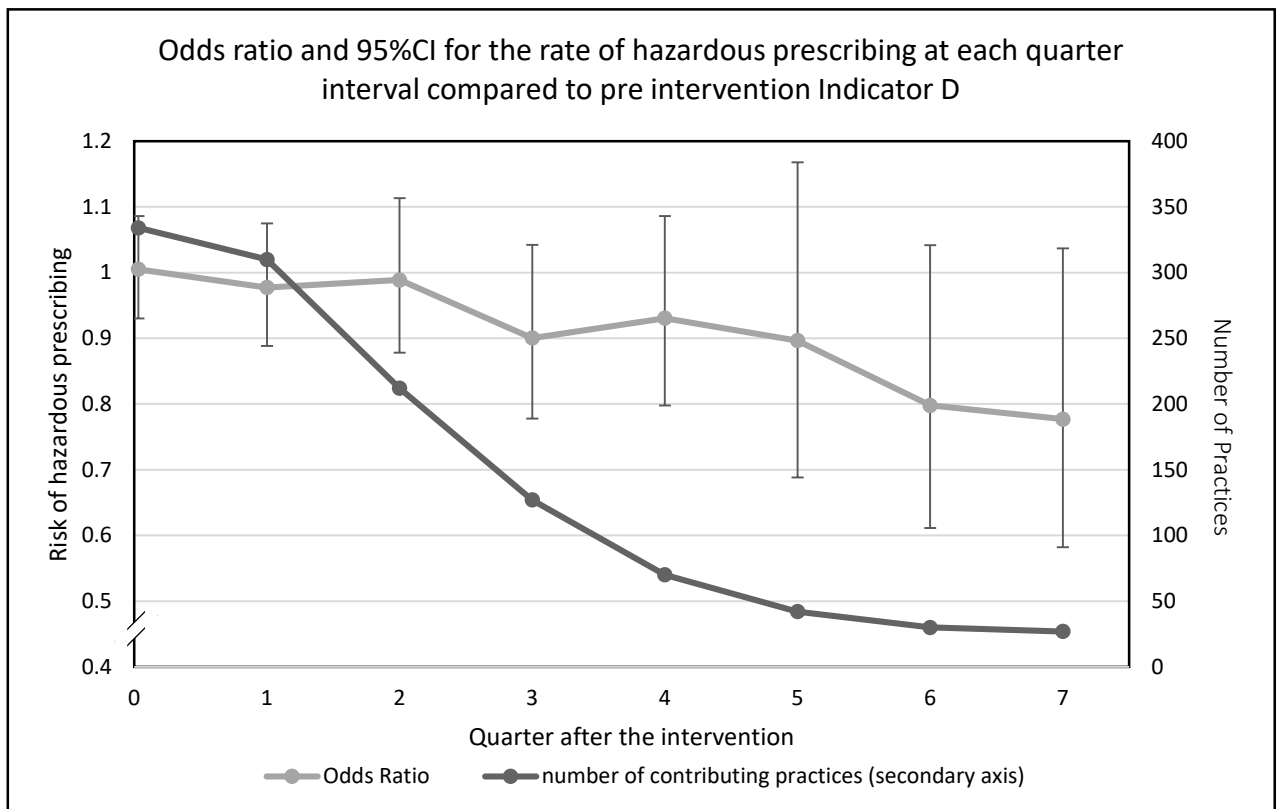

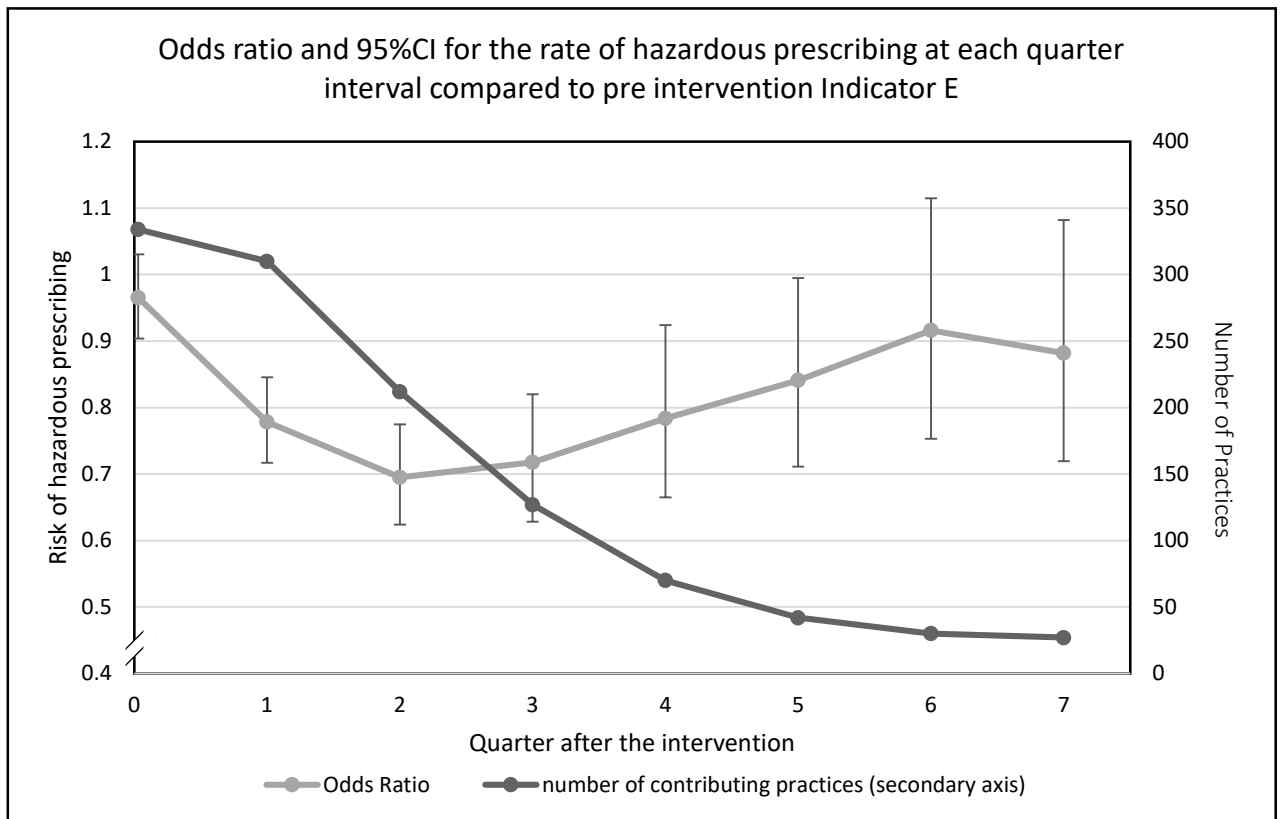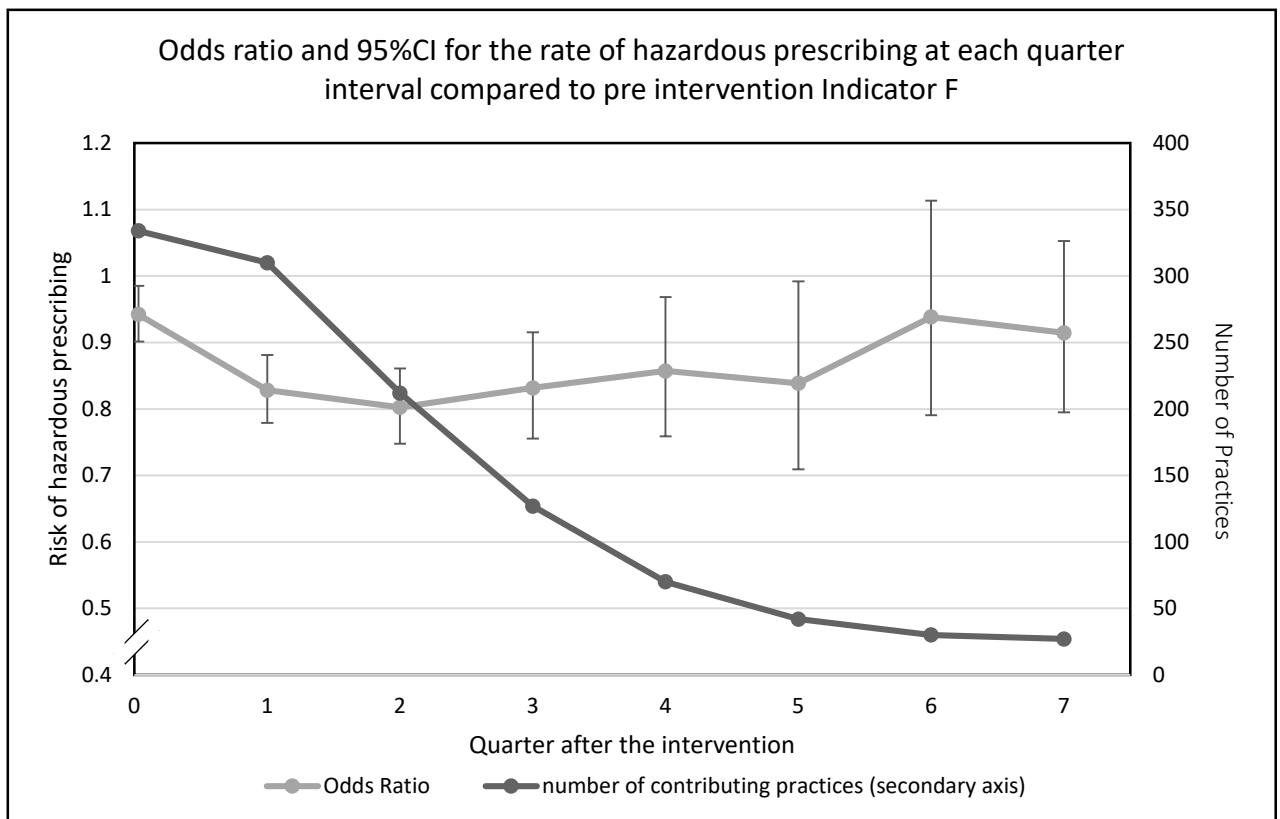

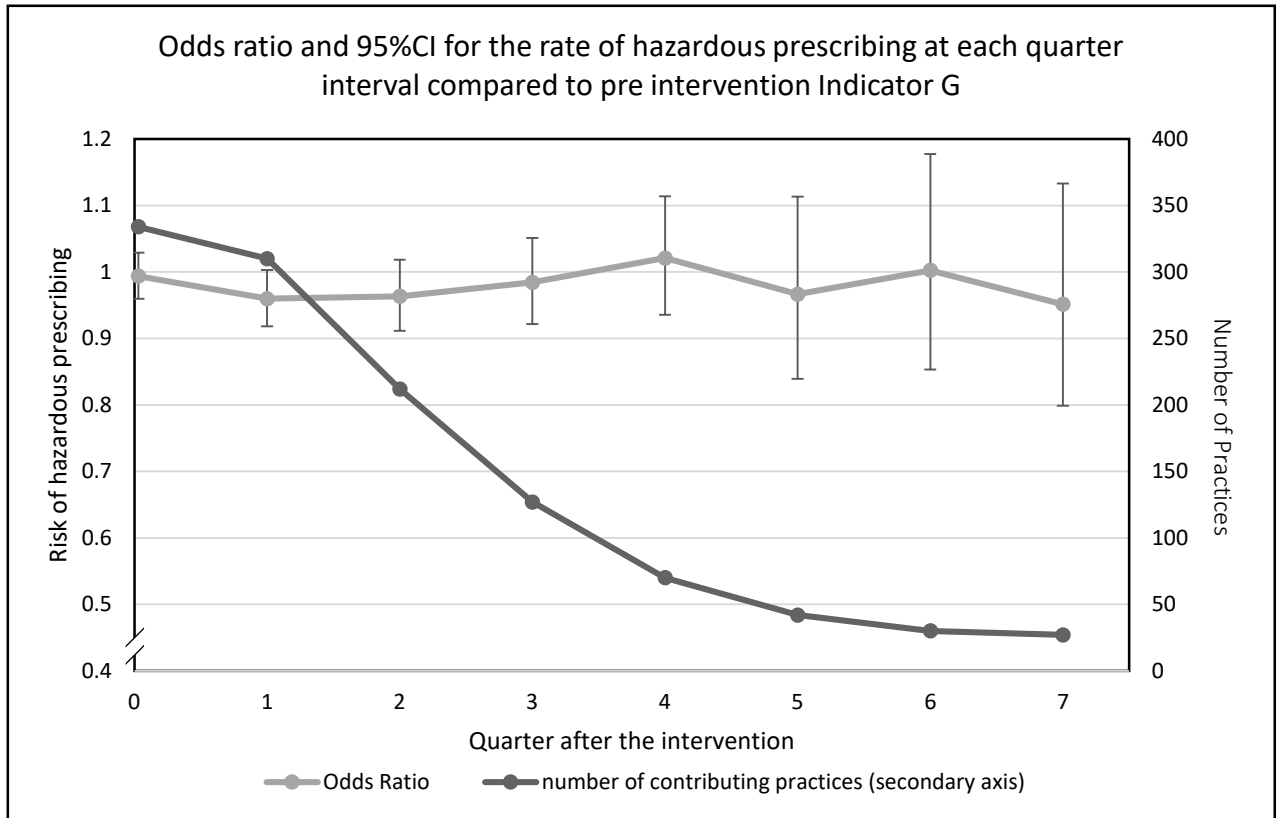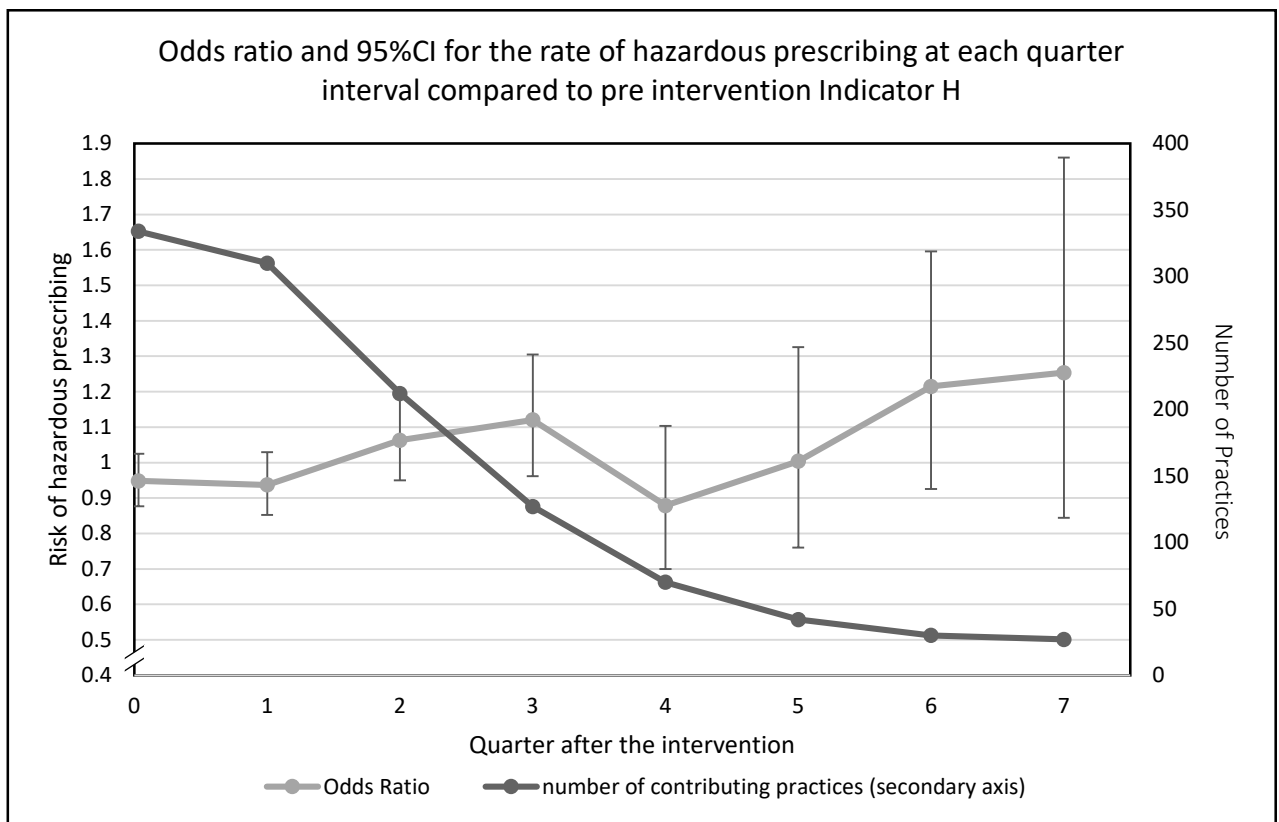

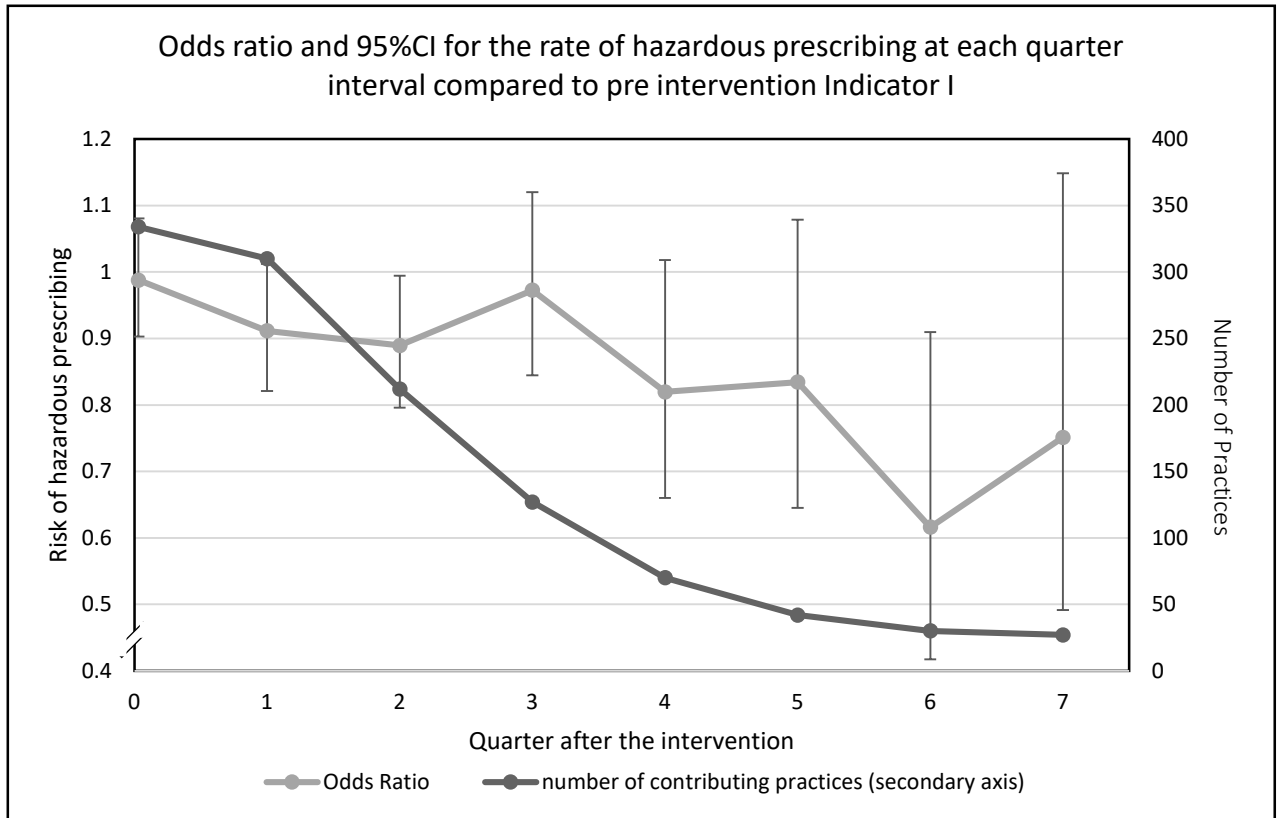

Note: the y axis has a larger range on this chart

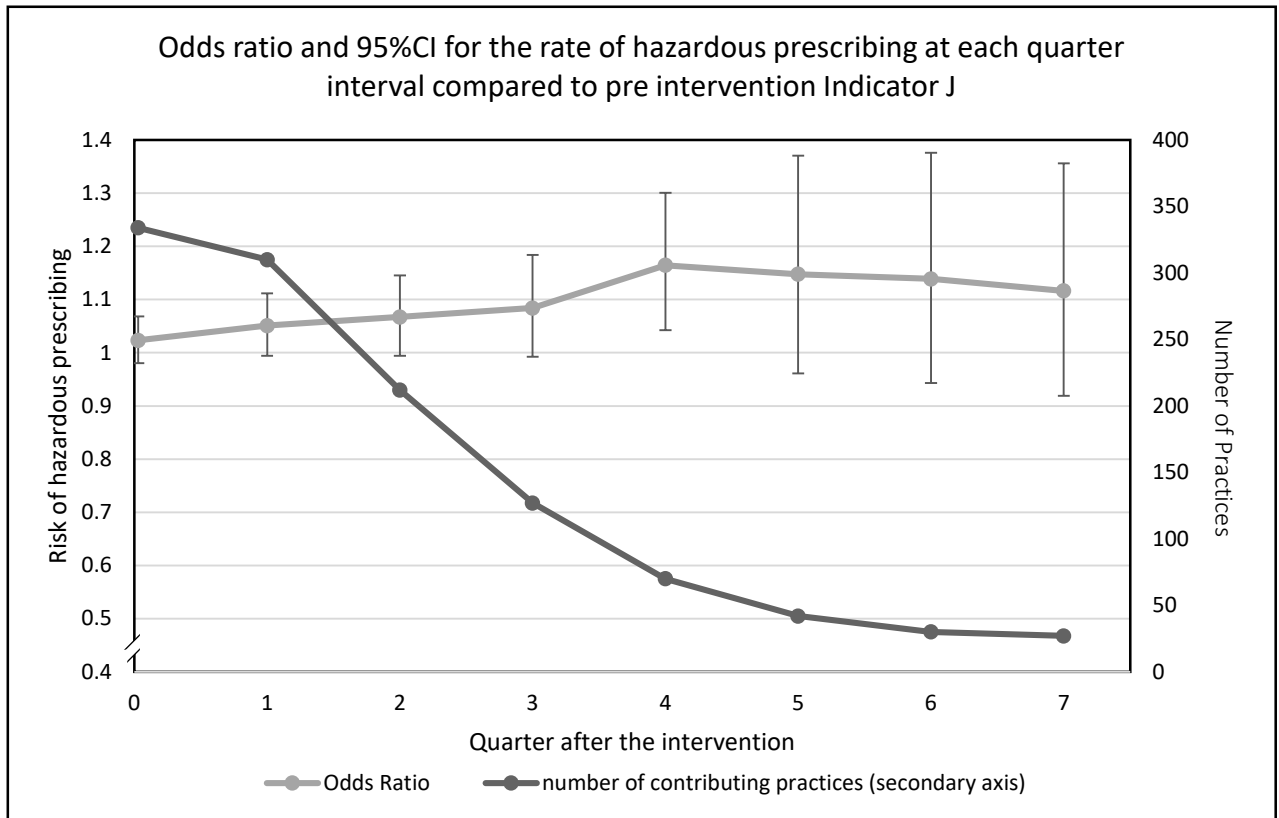

Note: the y axis has a larger range on this chart

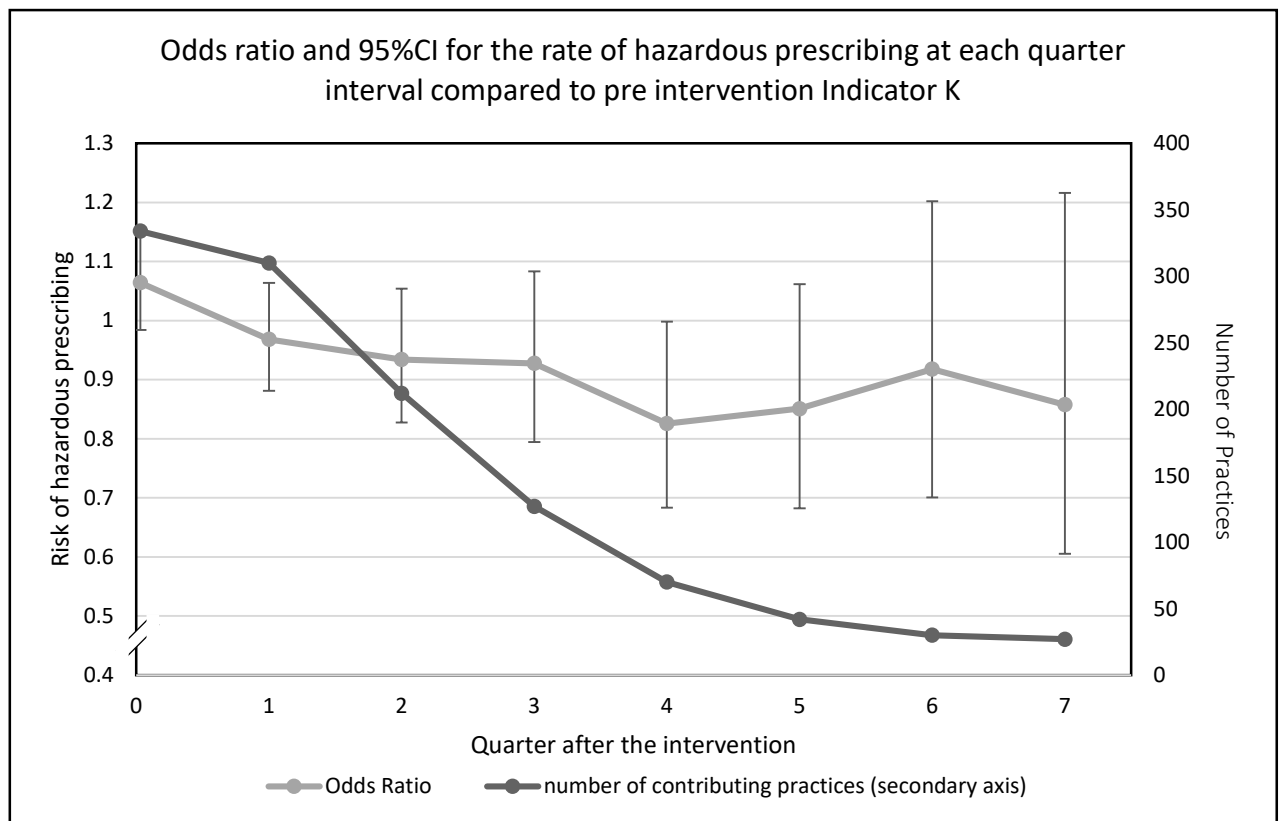

Supplement: pmed.1004133.s007.pdf [file pmed.1004133.s007.pdf]
